# Supplementary material for: HIF prolyl hydroxylase inhibition protects skeletal muscle from eccentric contraction-induced injury
Source: PubMed Central journal article supplement (PMC6234580; doi:10.1186/s13395-018-0179-5), 2018-11-13

Figure S1

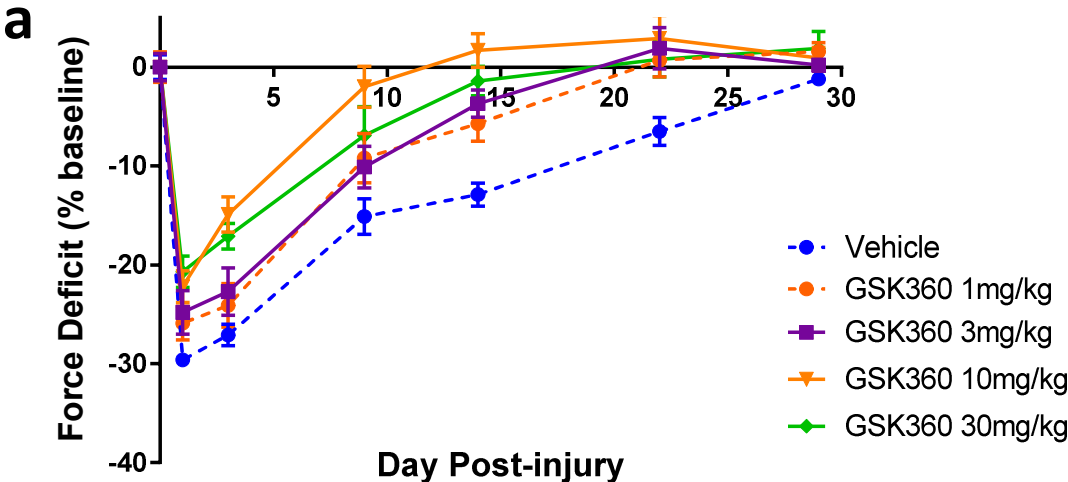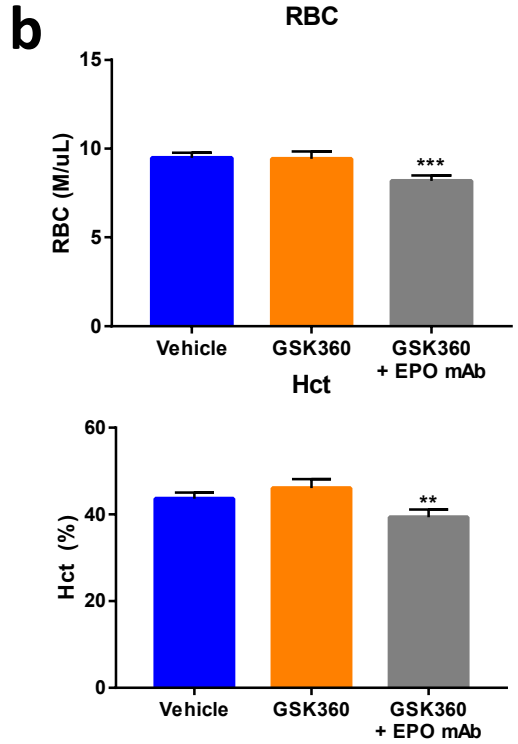

Supplement: 13395_2018_179_MOESM1_ESM.pdf [file 13395_2018_179_MOESM1_ESM.pdf]
