# Supplementary material for: HIF prolyl hydroxylase inhibition protects skeletal muscle from eccentric contraction-induced injury
Source: PubMed Central journal article supplement (PMC6234580; doi:10.1186/s13395-018-0179-5), 2018-11-13
Supplement: 13395_2018_179_MOESM5_ESM.pdf [file 13395_2018_179_MOESM5_ESM.pdf]

Table S2

| <b>Number of Subjects</b>                   | <b>Cohort 1<br/>Placebo</b> | <b>Cohort 1<br/>GSK1278863<br/>5 mg</b> | <b>Cohort 2<br/>Placebo</b> | <b>Cohort 2<br/>GSK1278863<br/>50 mg</b> |
|---------------------------------------------|-----------------------------|-----------------------------------------|-----------------------------|------------------------------------------|
| <b>Number of subjects</b> [N]               | 14                          | 12                                      | 15                          | 15                                       |
| <b>Age in Years</b> [Mean (SD)]             | 28.2 (3.36)                 | 29.3 (3.70)                             | 29.4 (4.87)                 | 28.2 (4.51)                              |
| <b>Sex</b> [n]                              |                             |                                         |                             |                                          |
| Female                                      | 0                           | 0                                       | 0                           | 0                                        |
| Male                                        | 14                          | 12                                      | 15                          | 15                                       |
| <b>BMI</b> (kg/m <sup>2</sup> ) [Mean (SD)] | 27.3 (2.8)                  | 26.8 (3.3)                              | 28.5 (3.4)                  | 26.0 (3.0)                               |
| <b>Height</b> (cm) [Mean (SD)]              | 177.1 (6.2)                 | 179.8 (7.5)                             | 179.8 (6.2)                 | 180.5 (6.7)                              |
| <b>Weight</b> (kg) [Mean (SD)]              | 85.4 (7.8)                  | 86.4 (10.4)                             | 92.2 (12.3)                 | 85.0 (13.5)                              |
| <b>Ethnicity</b> [n (%)]                    |                             |                                         |                             |                                          |
| Hispanic or Latino                          | 2 (14%)                     | 2 (17%)                                 | 2 (13%)                     | 1 (7%)                                   |
| Not Hispanic or Latino                      | 12 (86%)                    | 10 (83%)                                | 13 (87%)                    | 14 (93%)                                 |
| <b>Race</b> [n (%)]                         |                             |                                         |                             |                                          |
| African American/African Heritage           | 12 (86%)                    | 10 (83%)                                | 9 (60%)                     | 12 (80%)                                 |
| White                                       | 2 (14%)                     | 2 (17%)                                 | 6 (40%)                     | 3 (20%)                                  |
