# Supplementary material for: HIF prolyl hydroxylase inhibition protects skeletal muscle from eccentric contraction-induced injury
Source: PubMed Central journal article supplement (PMC6234580; doi:10.1186/s13395-018-0179-5), 2018-11-13
Supplement: 13395_2018_179_MOESM6_ESM.pdf [file 13395_2018_179_MOESM6_ESM.pdf]

Table S3

| Adverse Events                            | Cohort 1 | GSK127886 |      | Cohort 2 | GSK127886 |
|-------------------------------------------|----------|-----------|------|----------|-----------|
|                                           | Placebo  | 3         | 5 mg | Placebo  | 3 50 mg   |
|                                           | N=14     | N=12      |      | N=15     | N=15      |
|                                           | n (%)    | n (%)     |      | n (%)    | n (%)     |
| Any AE                                    | 4 (29%)  | 6 (50%)   |      | 3 (20%)  | 2 (13%)   |
| Any AE related to investigational product | 0        | 0         |      | 2 (13%)  | 0         |
| All AEs:                                  |          |           |      |          |           |
| Myalgia                                   | 3 (21%)  | 4 (33%)   |      | 1 (7%)   | 1 (7%)    |
| Headache                                  | 0        | 0         |      | 1 (7%)   | 1 (7%)    |
| Peripheral swelling                       | 0        | 1 (8%)    |      | 1 (7%)   | 0         |
| Arthralgia                                | 0        | 1 (8%)    |      | 0        | 0         |
| Fatigue                                   | 1 (7%)   | 0         |      | 0        | 0         |
| Oedema peripheral                         | 0        | 0         |      | 1 (7%)   | 0         |
| Somnolence                                | 1 (7%)   | 0         |      | 0        | 0         |
| Mouth ulceration                          | 0        | 1 (8%)    |      | 0        | 0         |
| Vomiting                                  | 0        | 0         |      | 1 (7%)*  | 0         |
| Acne                                      | 0        | 0         |      | 1 (7%)   | 0         |
| Dermatitis contact                        | 0        | 1 (8%)    |      | 0        | 0         |
| Pollakiuria                               | 0        | 0         |      | 1 (7%)*  | 0         |

Note: \* considered by the investigator to be related to study medication
